# Supplementary material
Source: PubMed Central journal article supplement (PMC2924026)
Supplement: supp_M110.140608_jbc.M110.140608-2.pdf [file supp_M110.140608_jbc.M110.140608-2.pdf]

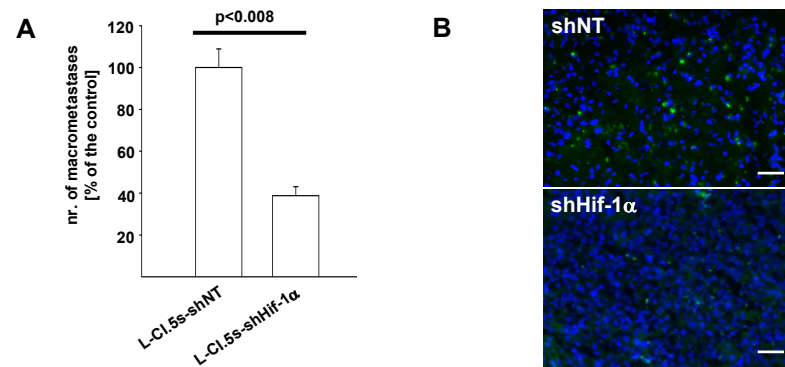

**Supplementary data 2:** **A.** Mean number of liver metastases  $> 0.2$  mm  $\pm$  SE (columns  $\pm$  bars) 7 d after intravenous inoculation of  $5 \times 10^3$  L-CI.5s-shNT or L-CI.5s-shHIF-1 $\alpha_2$  cells;  $n = 5$ . L-CI.5s-shNT: 52.6 %  $\pm$  4.7 %; L-CI.5s-shHIF-1 $\alpha_2$ : 20.4 %  $\pm$  2.2 %. HIF-1 $\alpha$  knock-down was achieved by use of a different shRNA. **B.** Immunofluorescence analysis for phosphorylated Met (green signal) in liver metastases 7 d after intravenous inoculation of  $5 \times 10^3$  L-CI.5s-shNT or L-CI.5s-shHIF-1 $\alpha_2$  cells. Counterstaining was done with DAPI (blue signal). Bars: 50  $\mu$ m. Lack of HIF-1 $\alpha$ , also led to a strong reduction of Met phosphorylation within metastases.
