# Supplementary material
Source: PubMed Central journal article supplement (PMC2924026)
Supplement: supp_M110.140608_jbc.M110.140608-3.pdf [file supp_M110.140608_jbc.M110.140608-3.pdf]

**A**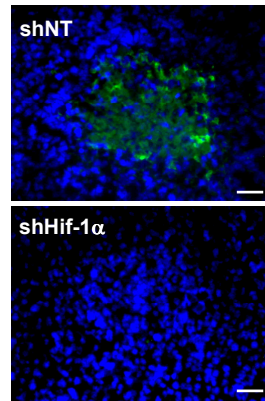**B**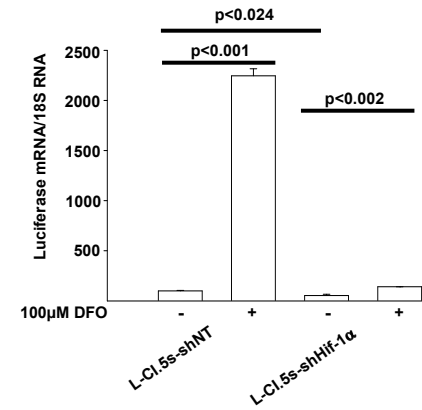

**Supplementary data 3: A.** *In situ* zymography of liver metastases 7 d after intravenous inoculation of  $5 \times 10^3$  L-CI.5s-shNT or L-CI.5s-shHIF-1 $\alpha$ \_2 cells. Counterstaining was done with DAPI (blue signal). Bars: 25  $\mu$ m. Lack of HIF-1 $\alpha$ , as achieved by use of a different shRNA, led to a strong reduction of gelatinolytic activity (green signal) within metastases. **B.** Mean luciferase-mRNA expression  $\pm$  SE (columns  $\pm$  bars) in L-CI.5s-shHIF-1 $\alpha$ \_2 cells, cultured with or without 100  $\mu$ M DFO. Luciferase-mRNA levels were normalized to 18S-mRNA levels and the mean of the reference group L-CI.5s-shNT (compare Fig. 5B) was set as 100 %;  $n = 3$ . L-CI.5s-shNT/without DFO: 100.0 % $\pm$ 4.7 %; L-CI.5s-shNT/with DFO: 2246.2 % $\pm$ 69.2 %; L-CI.5s-shHIF-1 $\alpha$ \_2/without DFO: 53.6 %  $\pm$  12.2 %; L-CI.5s-shHIF-1 $\alpha$ \_2/with DFO: 140.6 %  $\pm$  1.1 %.
