# Supplementary material
Source: PubMed Central journal article supplement (PMC2924026)
Supplement: supp_M110.140608_S_Fig_1.pdf [file supp_M110.140608_S_Fig_1.pdf]

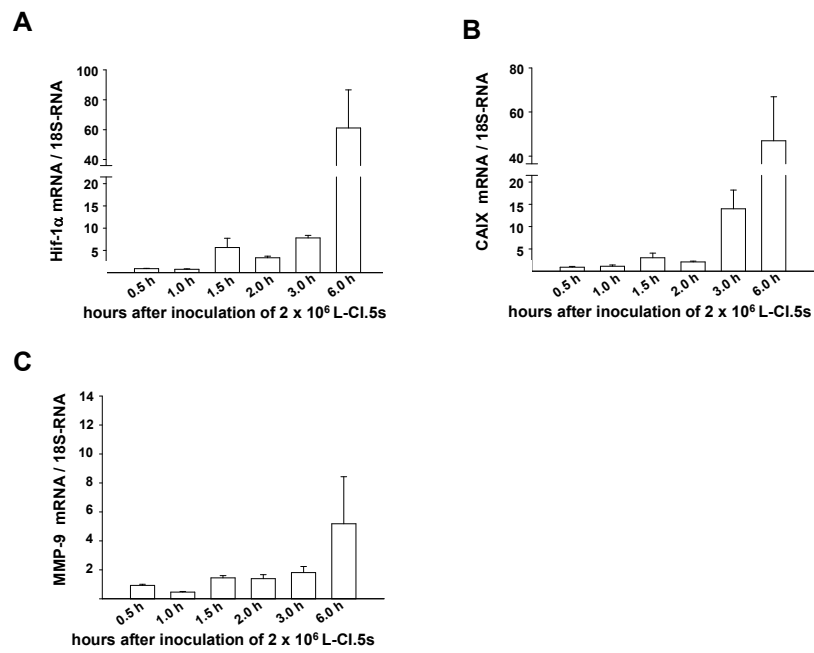

**Supplementary data 1:** Continuous ascent of mean HIF-1 $\alpha$ -mRNA levels (A), CAIX-mRNA levels (B), and MMP-9 mRNA levels (C), each  $\pm$  SE (columns  $\pm$  bars) and normalized to 18S-mRNA levels, during the early phase of liver colonization after intravenous inoculation of  $2 \times 10^6$  L-CI.5s-shNT or L-CI.5s-shHIF-1 $\alpha$  cells.  $n = 3$  each.
